# Supplementary material
Source: PubMed Central journal article supplement (PMC3635722)
Supplement: JCI65425sd.pdf [file JCI65425sd.pdf]

## **SUPPLEMENTAL DATA**

### **Supplementary Tables and Figures**

#### **Supplementary Table 1.**

| <b>Data base</b> | <b>Pathway</b> | <b>Genes</b>                             | <b>P-Value</b> | <b>FDR</b> |
|------------------|----------------|------------------------------------------|----------------|------------|
| KEGG             | ErbB           | CDKN1A, PAK2, PLCG1, ERBB3, CAMK2G, ABL2 | 0.0209         | 21.2063    |
| KEGG             | p53            | BID, CDKN1A, CD82, LRDD, BAI1            | 0.0351         | 33.1772    |
| Biocarta         | Glycolysis     | GPI, ALDOB, GAPDH                        | 0.0423         | 37.5070    |
| KEGG             | SNARE          | STX6, VAMP1, GOSR1, VAMP4, STX2          | 0.019134       | 35.7173    |

**Supplemental Table 1.** Gene array analysis in ATP11B-silenced A2780-CP20 cells.

The signaling pathways ErbB, p53, Glycolysis and the SNARE (soluble *N*-ethylmaleimide-sensitive-factor attachment protein receptor) were significantly deregulated in ATP11B-silenced A2780-CP20 cells. Integrated function and pathway analysis were performed using DAVID bioinformatics resources (<http://david.abcc.ncifcrf.gov/>) and significant features were clustered.

## Supplementary Table 2

| <b>SNARE- genes</b> | <b>ATP11B-siRNA/Cr-siRNA<br/>Fold-change</b> | <b><i>P</i>- value</b> |
|---------------------|----------------------------------------------|------------------------|
| STX6                | 0.61                                         | 0.0040                 |
| VAMP1               | 0.80                                         | 0.0045                 |
| GOSR1               | 0.79                                         | 0.0478                 |
| VAMP4               | 1.24                                         | 0.0260                 |
| STX2                | 1.30                                         | 0.0283                 |

**Supplementary Table 2.** Gene array analysis in ATP11B-silenced A2780-CP20 cells.

In ATP11B-silenced A2780-CP20 ovarian cancer cells, five genes of the SNARE pathway were significantly deregulated: syntaxin-4 and 6 (STX4, STX6), vesicle associated membrane protein 1 and 4 (VAMP1 and VAMP4) and Golgi SNAP (synaptosomal associated protein) receptor 1 (GOSR1).

# Supplementary Figure 1.

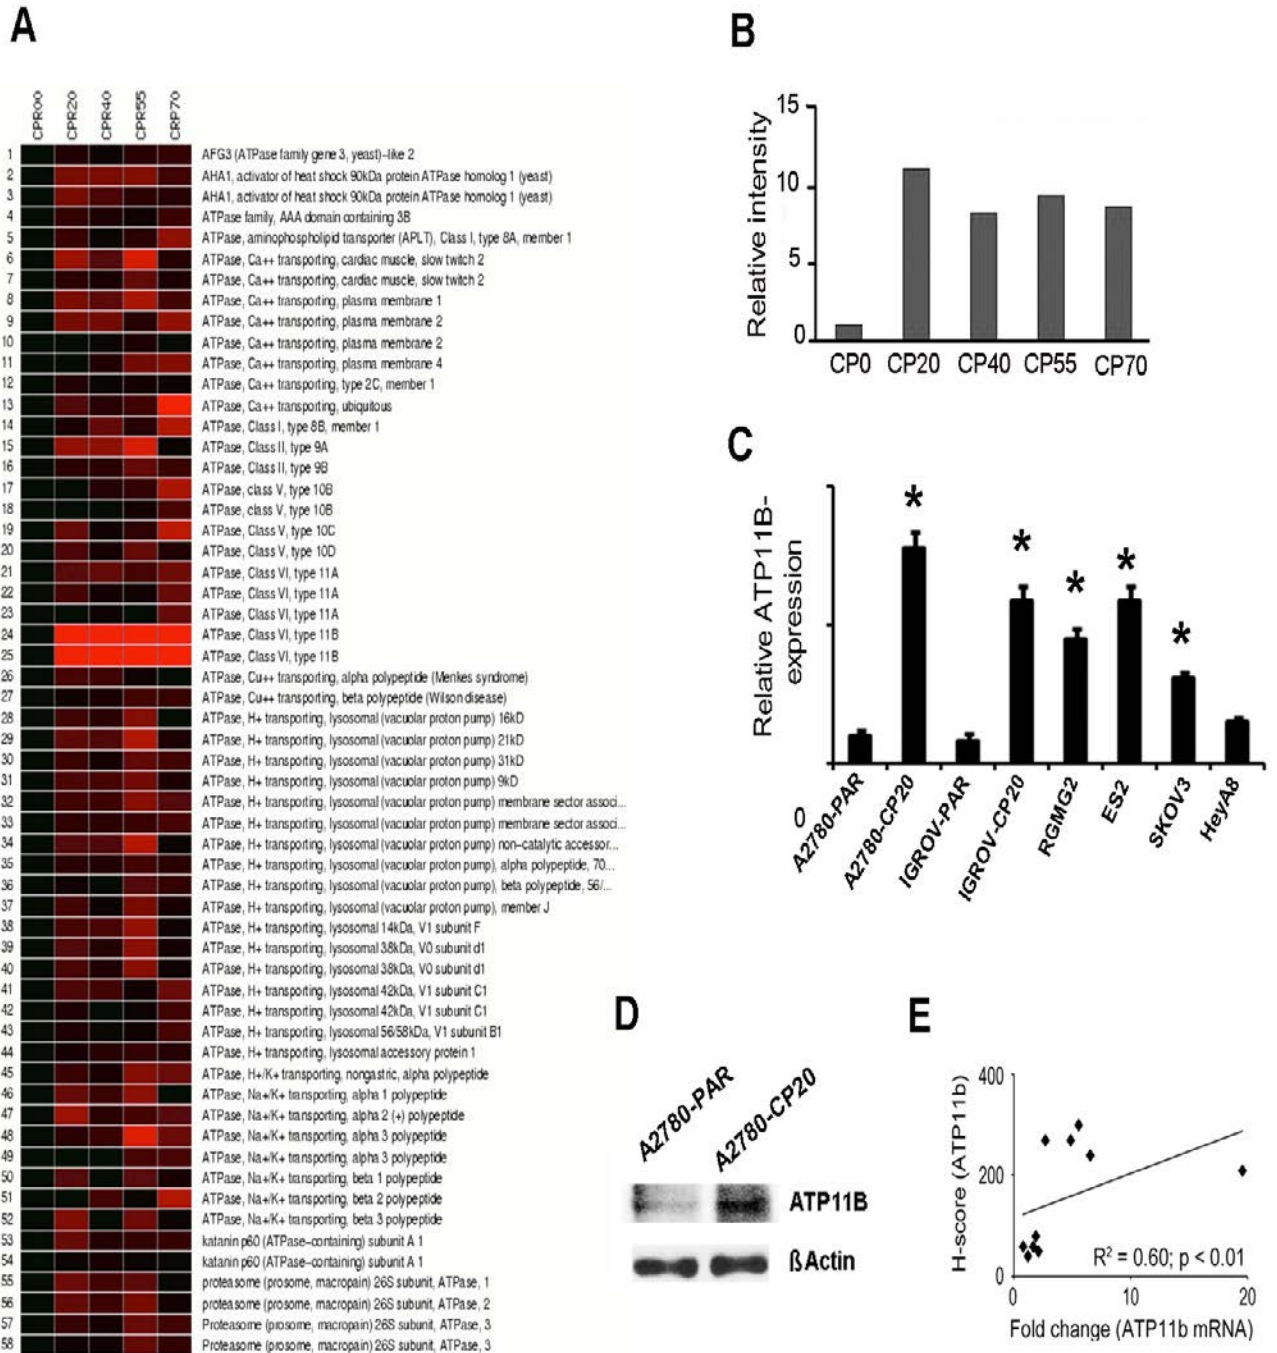

Supplementary Figure 2.

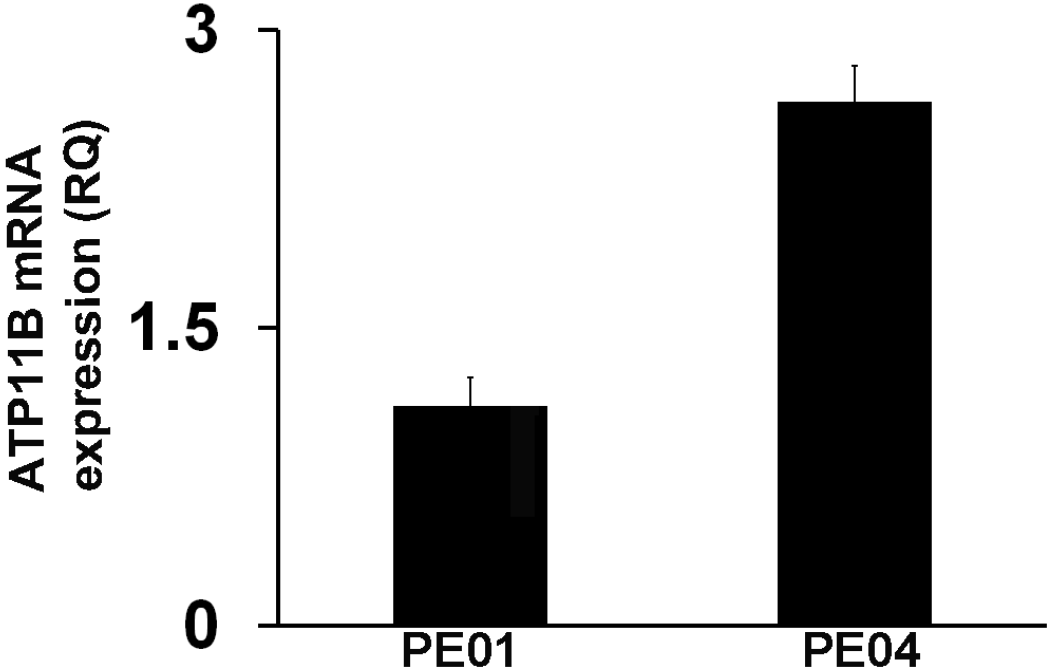

Supplementary Figure 3.

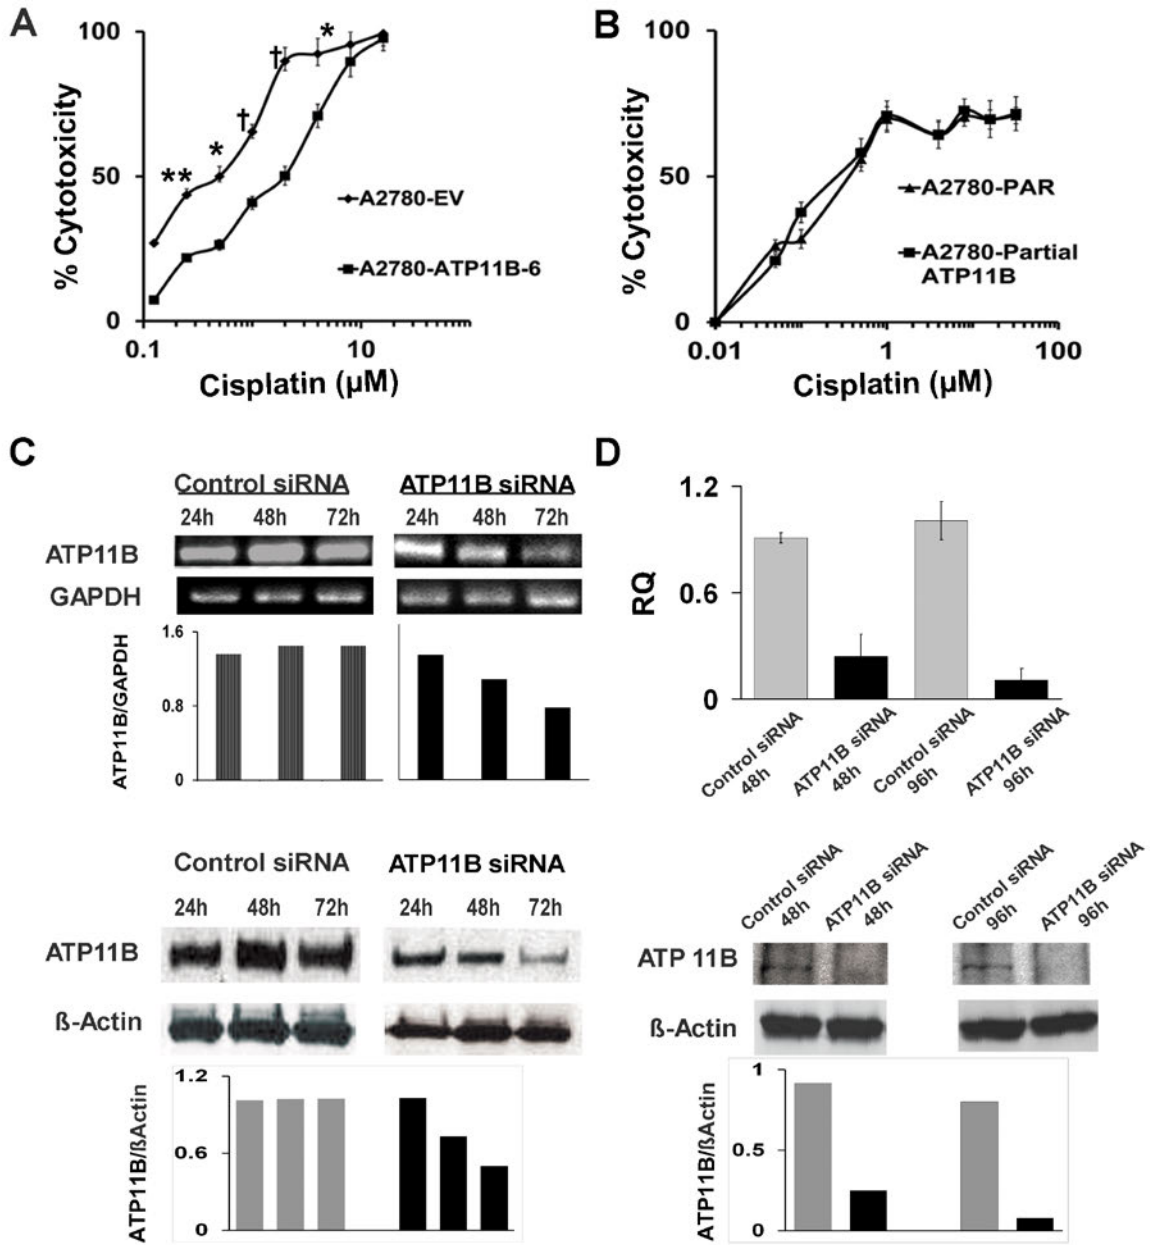

Supplementary Figure 4.

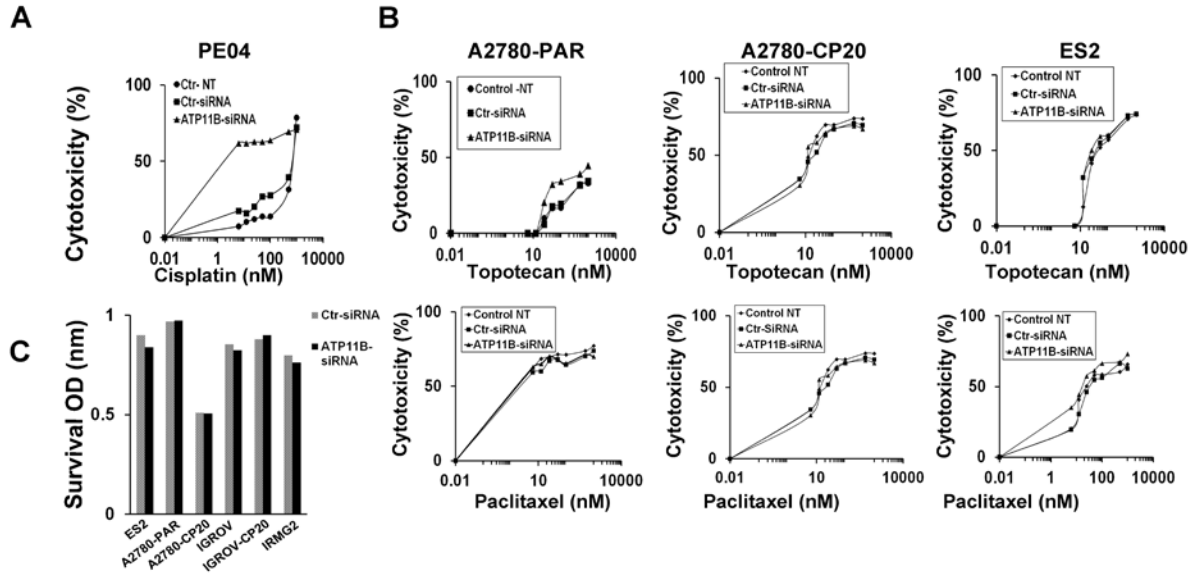

Supplementary Figure 5.

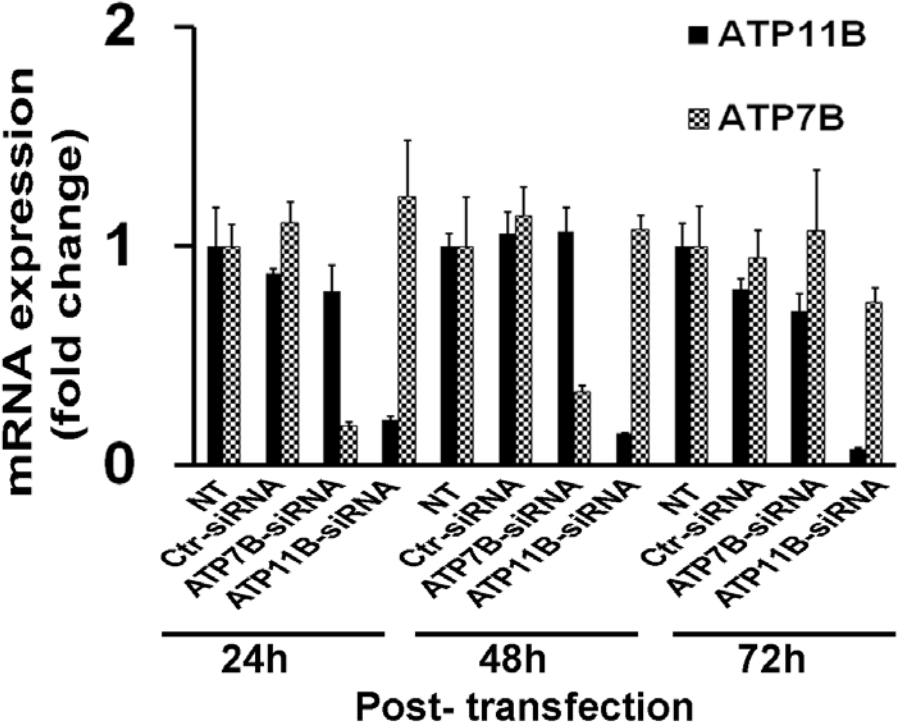

Supplementary Figure 6.

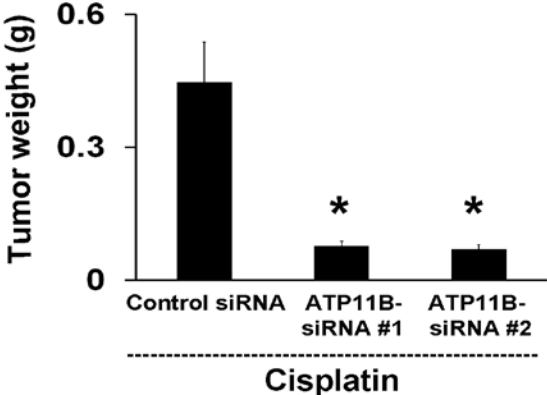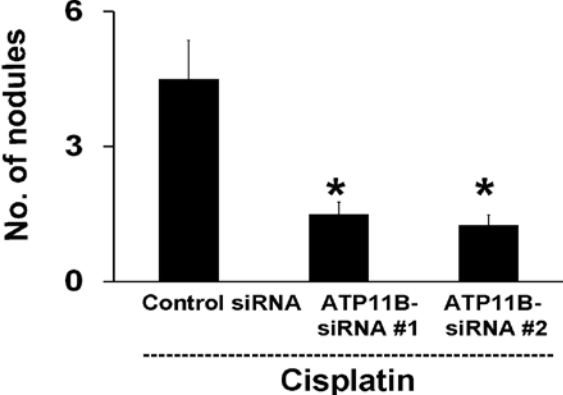



Supplementary Figure 7.

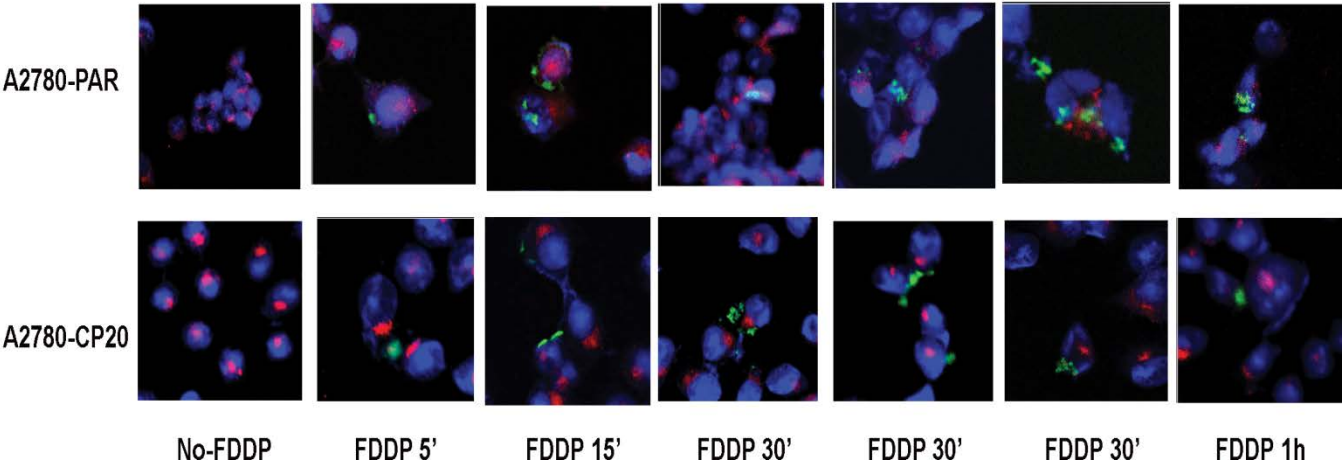

**Supplementary Figure 8.**

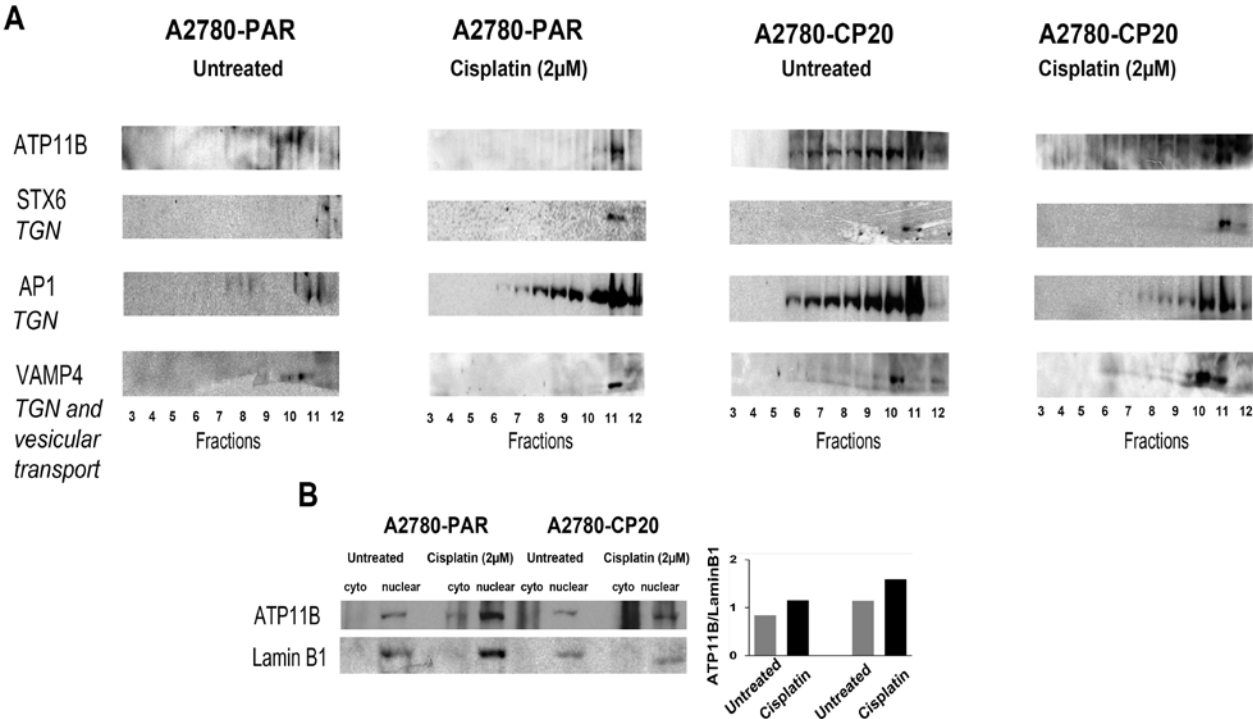

Supplementary Figure 9.

A

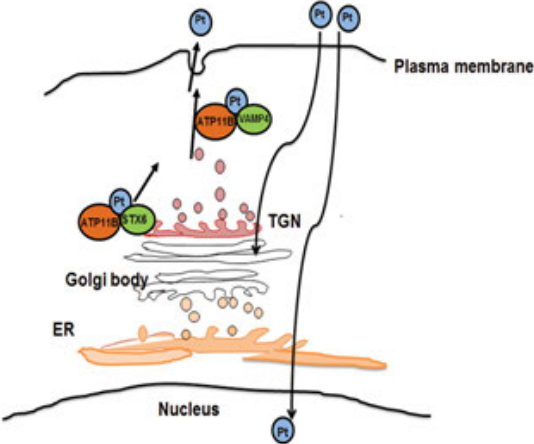

B

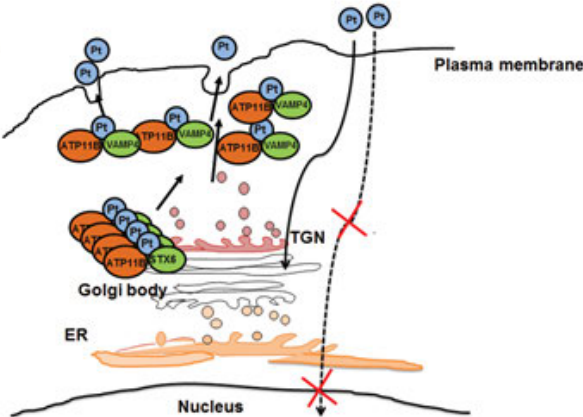

Supplementary Figure 10.

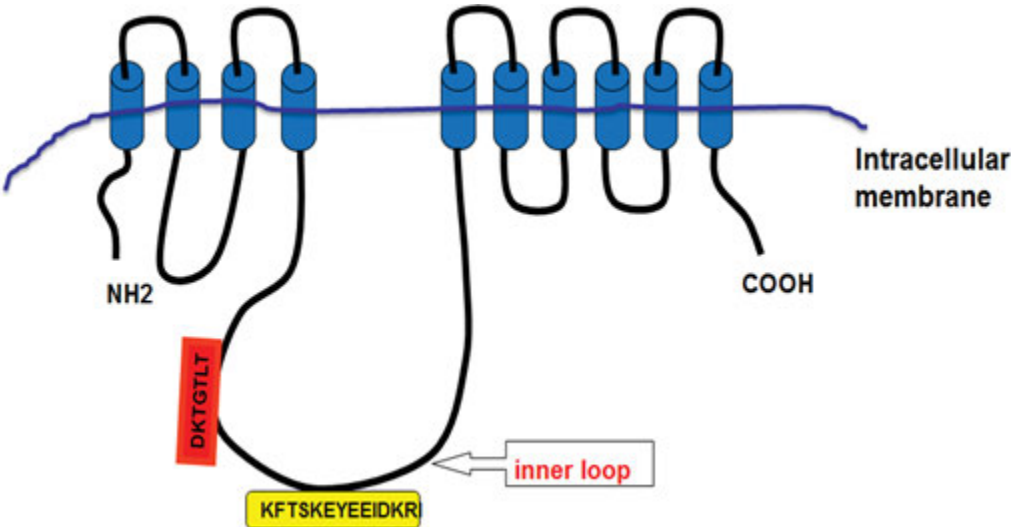

## Legends of Supplementary Figures

### Supplementary Figure 1

**(A)** Gene array analyses in human cisplatin-resistant ovarian cancer cells. Heat map showing gene expression profile from ATP-ases in the progressively resistant ovarian cancer cell lines A2780-CP20, CP40, CP55, and CP70, compared with the A2780-PAR cells. ATP11B, a type 4 P-type ATPase transport membrane protein, was highly upregulated in all cell lines tested. **(B)** A2780-CP20 cells had the highest ATP11B expression. **(C)** ATP11B gene expression was also significantly elevated in other cisplatin-resistant ovarian cancer cells (A2780-CP20, IGROV1-CP20, RMG2 ,ES2), and SKOV3, compared with the highly sensitive A2780-PAR cells ( $*P < 0.01$ ). **(D)** Protein expression was confirmed to be increased in the A2780-CP20 cells compared with the A2780-PAR cells. **(E)** Significant correlation between ATP11B mRNA and protein expression.

### Supplementary Figure 2

ATP11B mRNA expression in primary human ovarian cancer cells P0E1 and P0E4 cells. Relative quantification (RQ) values were normalized to a house keeping gene (18S) and then normalized to a calibrator sample (normal ovarian tissue) according to the  $2^{-\Delta\Delta C_t}$  comparative threshold cycle (Ct) method {Livak, 2001 #19854} TD). P0E4 (chemo-resistant) cells exhibited 2.4 fold greater ATP11B expression levels compared to those from P0E1 (chemo-sensitive) cells. A value of RQ 1 was assigned to P0E1 cells.

### Supplementary Figure 3

**(A)** Half-maximal inhibitory concentration ( $IC_{50}$ ) was determined by means of the MTT assay using a wide range of cisplatin concentrations (0-32  $\mu$ M).  $IC_{50}$  for A2780-EV and A2780-ATP11B-6 were 0.52 and 2.0  $\mu$ M, respectively (\* $P$  < 0.05; \*\* $P$  < 0.01; † $P$  < 0.001). **(B)** In contrast, the  $IC_{50}$  of A2780 cells transfected with C-terminal partial ATP11B sequence was very similar to the  $IC_{50}$  for A2780 parental cells. **(C)** RT-PCR analysis of ATP11B expression in A2780-PAR cells transfected with control-siRNA and with ATP11B-siRNA. Compared with control-siRNA transfected cells, ATP11B mRNA expression was decreased by >50% in the ATP11B-siRNA transfected cells. Western blotting analyses confirmed the decrease of ATP11B protein expression (29 and 52%) after the same transfection times (48 and 72 hours). **(D)** mRNA expression of ATP11B in A2780-CP20 tumor tissues harvested at 48 and 98 hours after injection of a single dose of ATP11B siRNA-DOPC (150  $\mu$ g/kg i.p.). QRT-PCR data indicated a decrease in ATP11B expression levels of 74 and 89% after 48 and 96 hours, respectively, compared to those from tumor tissues injected with Ctr-siRNA. ATP11B protein levels were similarly reduced (73 and 90%) after 48 and 96 hours of ATP11B siRNA-cell injection.

#### **Supplementary Figure 4**

**(A)** ATP11B downregulation increases sensitivity of primary ovarian cancer (chemo-resistant) P0E4 cells to cisplatin ( $*P < 0.05$ ). **(B)** Survival curves from primary ovarian cancer cells: A2780-PAR, A2780-CP20 and ES2 showing no significant effect of ATP11B silencing on sensitivity to paclitaxel or topotecan. **(C)** ATP11B silencing did not significantly affect survival of ovarian cancer cells: ES2, A2780-PAR, A2780-CP20, IGROV, IGROV-CP20 and RMG2.

#### **Supplementary Figure 5**

ATP7A and ATP11B expression levels are not coordinately regulated in A2780-CP20 cells. QPCR analysis showed no significant change in ATP7B levels following ATP11B gene silencing; similarly no significant changes in ATP11B levels were noted following ATP7B gene silencing compared with their corresponding Ctr-siRNA or not-treated (NT) A2780-CP20 cells.

#### **Supplementary Figure 6**

Effect of two independent ATP11B-siRNA sequences in combination with cisplatin on A2780-CP20 tumor growth. Treatments of ATP11B-siRNA-DOPC (Seq. #1) or ATP11B-siRNA-DOPC (Seq. #2) plus cisplatin significantly blocked tumor growth (83, 85%;  $*P < 0.05$ ) and reduced the number of tumor nodules (67, 72%;  $*P < 0.05$ ), respectively, compared to Ctr-siRNA mice group. Data are means  $\pm$  SE. N=5 mice/group.

### **Supplementary Figure 7**

Immunofluorescence confocal images (200×) from 2780-PAR and A2780-CP20 cells in the presence of fluorescent cisplatin (FDDP). A2780-PAR and A2780-CP20 cells were exposed to 2 μM green FDDP for different times (5 minutes up to 1 hour) and immunostained for detection of ATP11B. After 30 minutes and 1 hour of FDDP exposure, FDDP was frequently detected in the nucleus of A2780-PAR cells. In contrast, FDDP was seldom found in the nucleus of A2780-CP20 cells (green: FDDP; red: ATP11B; blue: nuclei).

### **Supplementary Figure 8**

Distribution of ATP11B and SNARE proteins in sucrose gradient fractions. **(A)** Endomembrane fractions were prepared from A2780-PAR and A2780-CP20 cells, untreated and cisplatin-treated. After sucrose-gradient fractionation, an equal-volume samples from each gradient fraction were separated by SDS-PAGE and probed by Western blotting against a panel of Golgi and endosomal protein markers. The main subcellular localization of each protein is shown in italics. **(B)** ATP11B localization was analyzed in cytosolic and nuclear fractions from these cells. Lamin B1 was used as a nuclear protein marker.



### **Supplementary Figure 9**

Hypothetical model of the role of ATP11B in platinum transport in ovarian cancer cells.

**(A)** Inside cisplatin-sensitive cells, the trans-golgi-network (TGN) is one of the main Pt-target compartments. In the TGN, Pt may be temporarily sequestered and/or may be captured in TGN-intermediate/ secretory vesicles for export. ATP11B and the SNARE proteins: syntaxin 6 (STX6) and vesicular associated membrane protein 4 (VAMP4) enhance Pt efflux via the vesicular secretory pathway. Pt also targets its ultimate cellular target, the nuclear DNA. **(B)** In cisplatin-resistant cells, upregulation of ATP11B increases vesicular-mediated-Pt export, preventing Pt from reaching the nucleus.

### **Supplementary Figure 10**

ATP11B is a Type 4 P-type ATPase-transport membrane protein. The protein structure of ATP11B shows ten transmembrane (TM) domains. P-type ATPase phosphorylation consensus sequence (red box) is located in TM4. The sequence at the inner loop from TM4 (yellow box) was used to raise a rabbit antiserum (Sigma) against ATPB11-protein.
